# Supplementary material for: Parathyroid carcinoma arising from auto-transplanted parathyroid tissue after Total Parathyroidectomy in chronic kidney disease patient: a case report
Source: Springer Nature journal article supplement (doi:10.1186/s12882-019-1606-5), 2019-11-15
Supplement: MOESM1 [file 17393426]

**Supplementary Figure 1**



**Supplementary Figure 1: Preoperative neck CT.** (A) (B) Small enhancing masses in the retrothyroidal area on both sides (black arrows). (A) Axial view; (B) Coronal view.

**Supplementary Figure 2**



**Supplementary Figure 2: Serologic test results.** Elevated PTH and phosphorus decreased after total parathyroidectomy with auto-transplantation (1st operation: 10/2011). Prior to complete resection (2nd operation: 03/2019) of the auto-transplanted parathyroid tissue, PTH and total calcium levels were increased while phosphorus remained normal. After complete resection, PTH and calcium levels decreased. All measurements represent the mean value.
